# Supplementary material for: Regulation of Transporters for Organic Cations by High Glucose
Source: MDPI journal article supplement (doi:10.3390/ijms241814051), 2023-09-13
Supplement: s1 [file s1]

**Supplementary Table S1.** List of primer sequences used for real-time PCR detection of SLC22A1 (hOCT1), SLC22A2 (hOCT2), and SLC47A1 (hMATE1), and glyceraldehyde-3-phosphatedehydrogenase (GAPDH).

| Primer |         | Sequences (5' → 3')             |
|--------|---------|---------------------------------|
| OCT1   | Forward | CAT CAT AAT CAT GTG TGT TGG CC  |
|        | Reverse | CAA ACA AAA TGA GGG GCA AGG CTT |
| OCT2   | Forward | CGC CAT TCC TGG TCT ACC GGC     |
|        | Reverse | GCT TCC TCG ATG GTC TCA GGC     |
| MATE1  | Forward | AAG CTG GAG CTG GAT GCA GTC     |
|        | Reverse | CAG CAG AGG AGC AGG ACG AGC     |
| GAPDH  | Forward | CAA GCT CAT TTC CTG GTA TGA C   |
|        | Reverse | GTG TGG TGG GGG ACT GAG TGT GG  |

**Supplementary Table S2.** Ct values obtained by real-time PCR detection of SLC22A1 (hOCT1), SLC22A2 (hOCT2), and SLC47A1 (hMATE1), and glyceraldehyde-3-phosphatedehydrogenase (GAPDH) in HEK293 cells stably transfected with the respective transporter.

| Cell line     | mRNA   | Ct value (mean ± SEM) |
|---------------|--------|-----------------------|
| hOCT1-HEK293  | hOCT1  | 22.4 ± 0.3, N = 4     |
|               | GAPDH  | 15.3 ± 0.2, N = 4     |
| hOCT2-HEK293  | hOCT2  | 16.2 ± 0.3, N = 4     |
|               | GAPDH  | 14.2 ± 0.7, N = 4     |
| hOCT3-HEK293  | hOCT3  | 22.1 ± 1.2, N = 4     |
|               | GAPDH  | 15.6 ± 0.2, N = 4     |
| hMATE1-HEK293 | hMATE1 | 17.9 ± 0.1, N = 4     |
|               | GAPDH  | 15.9 ± 0.1, N = 4     |

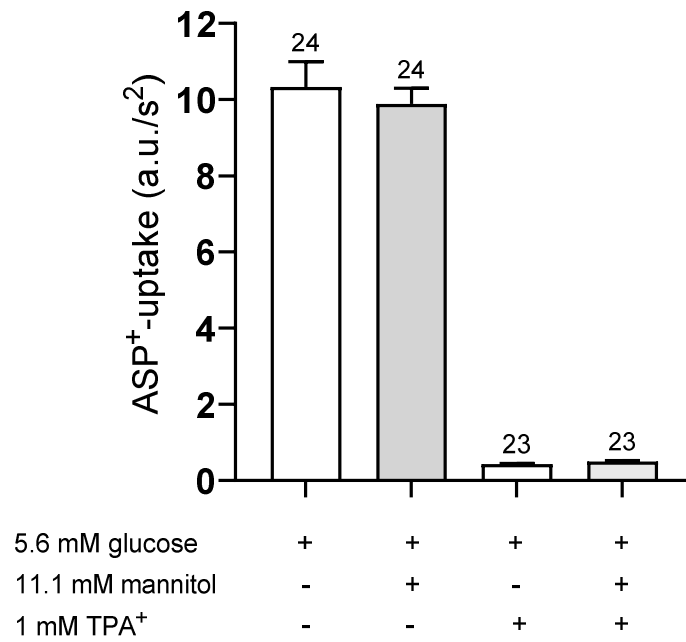

**Supplementary Figure S1.** Effect of increased medium osmolarity by addition of 11.1 mM mannitol on ASP<sup>+</sup> uptake rates (determined in the presence or not of 100 nM TPA<sup>+</sup>) in hOCT2-HEK293 cells after 48 h incubation. Values are means  $\pm$  SEM of initial fluorescence increase in arbitrary units (a.u.)/s<sup>2</sup> calculated from 23–24 replicates measured in at least 3 independent experiments. The number of replicates is reported on every column. The addition of mannitol did not change ASP<sup>+</sup> uptake rates.

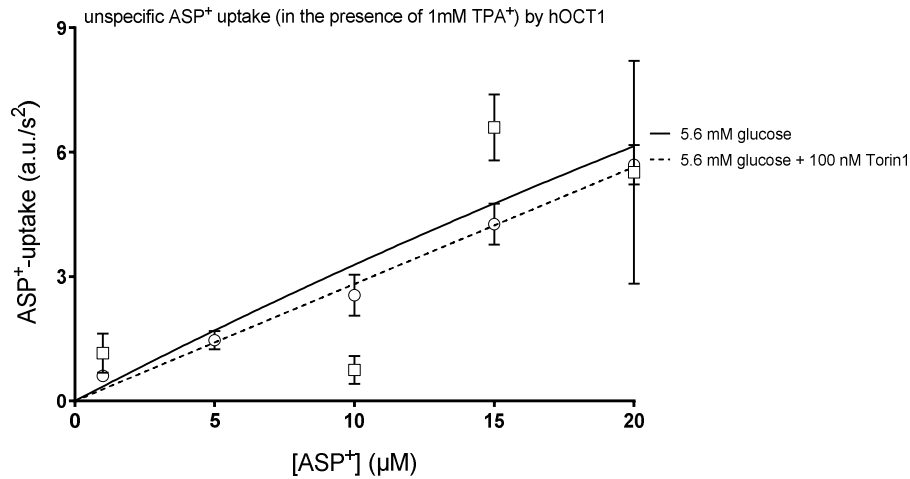

**Supplementary Figure S2.** Determination of ASP<sup>+</sup> unspecific uptake rates (determined in the presence of 100 nM TPA<sup>+</sup>) in hOCT1-HEK293 cells after 48 h incubation with 5.6 mM glucose in the presence (open squares) or not (open circles) of 100 nM Torin 1. Values are means  $\pm$  SEM of initial fluorescence increase in arbitrary units (a.u.)/s<sup>2</sup> calculated from 3–23 replicates measured in at least 3 independent experiments.

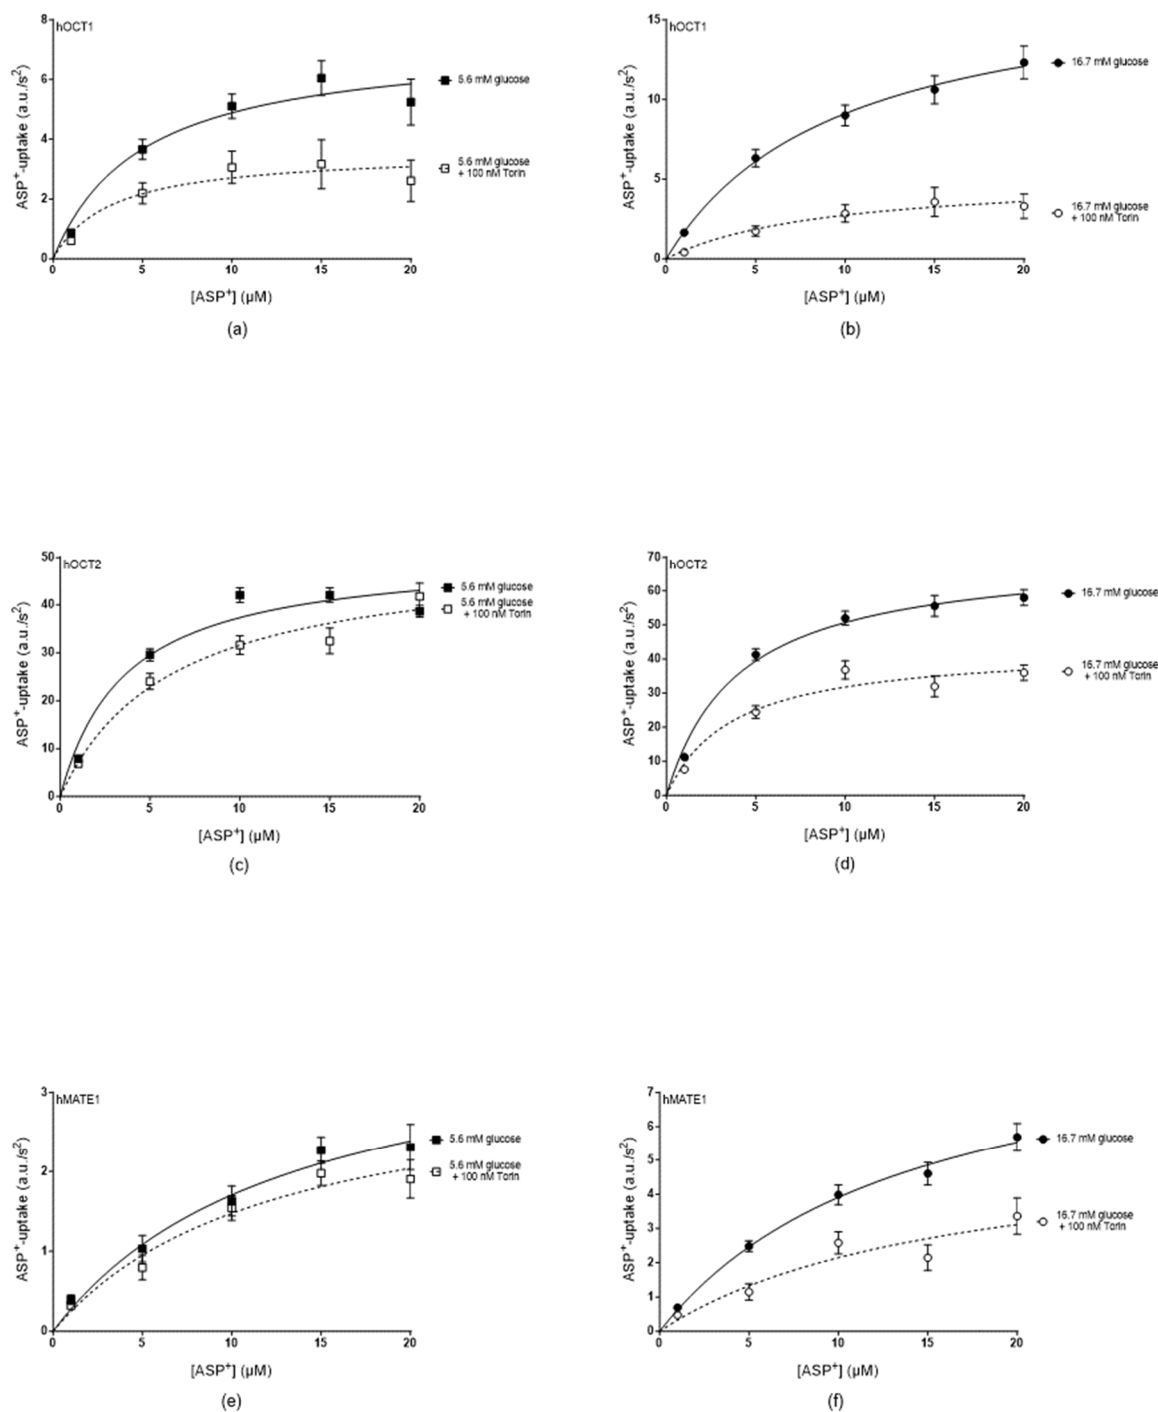

**Supplementary Figure S3.** ASP<sup>+</sup> specific uptake rates in hOCT1- (panels **a** and **b**), hOCT2- (panels **c** and **d**) and hMATE1- (panels **e** and **f**) HEK293 cells after 48 h incubation with 5.6 (closed squares, panels **a**, **c**, and **e**) or 16.7 mM glucose (closed circles, panels **b**, **d**, and **f**) compared to that measured in the presence of 100 nM Torin-1 (open squares for measurements under 5.6 mM glucose in panels **a**, **c**, and **e** and open circles for measurements under 16.7 mM glucose in panels **b**, **d**, and **f**). Values are mean  $\pm$  SEM of initial fluorescence increase in arbitrary units (a.u.)/s<sup>2</sup> calculated from 19–63 replicates/concentration measured in at least 3 independent experiments.

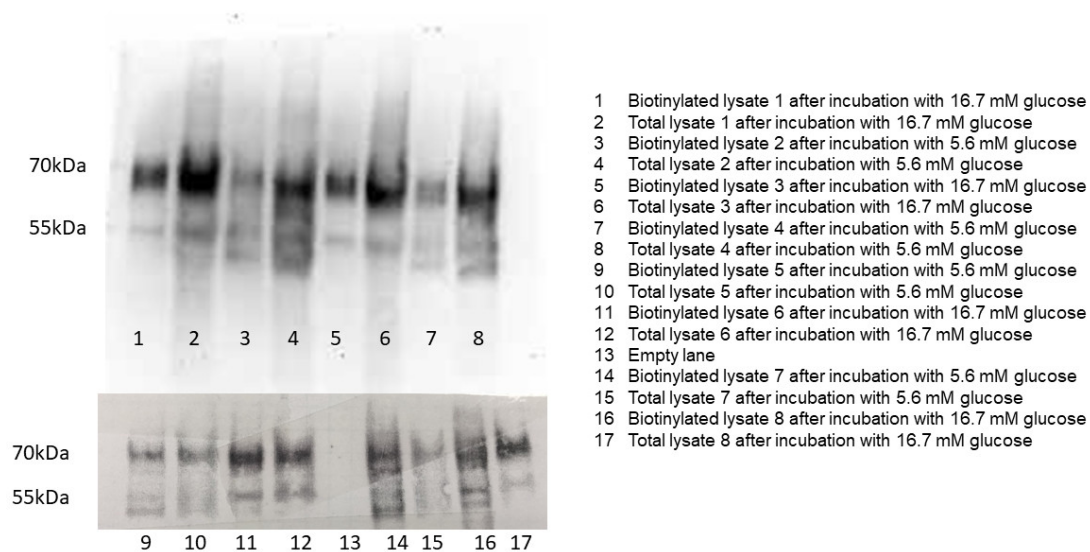

**Supplementary Figure S4.** Investigation of hOCT2 expression in the plasma membrane by biotinylation experiments. The panels show Western blot analysis of hOCT2 expression in biotinylated fraction and total cell lysates from cell incubated for 48 h in the presence of 5.6- or 16.7-mM glucose. The contents of the lanes are explained in the legend on the right. The lane 13 is empty. Molecular dimensions in kDa are indicated by the numbers on the left.
